# Supplementary material
Source: PubMed Central journal article supplement (PMC10512169)
Supplement: jamapsychiatry-e233293-s001.pdf [file jamapsychiatry-e233293-s001.pdf]

## Supplementary Online Content

Chopra S, Segal A, Oldham S, et al. Network-based spreading of gray matter changes across different stages of psychosis. *JAMA Psychiatry*. Published online September 13, 2023. doi:10.1001/jamapsychiatry.2023.3293

**eMethods 1.** Description of Each Data Set Used

**eMethods 2.** MRI Acquisition Parameters

**eMethods 3.** DBM Processing

**eMethods 4.** Volume Change Contrasts

**eMethods 5.** DWI Processing

**eMethods 6.** fMRI Processing

**eMethods 7.** FDR-Corrected and -Uncorrected Voxel-Level DBM  $t$  Statistic Maps for Each Contrast

**eMethods 8.** FDR-Corrected and -Uncorrected Voxel-Level VBM  $t$  Statistic Maps for Each Contrast

**eMethods 9.** Benchmark Null Models for the Coordinated Deformation Model (CDM)

**eMethods 10.** Further Information Network Diffusion Model (NDM) and Benchmark Null Models

**eMethods 11.** Data-Driven Epicentre Mapping Methods

**eMethods 12.** Robustness Analyses

**eFigure 1.** Sample-Level Associations Between Model Performance and Illness Duration and Severity

**eFigure 2.** Data-Driven Epicentre Region Identification Using Different Null Models

**eFigure 3.** Scatterplots of Observed and Estimated GMV Alterations Using the Best Seed Across the Whole Brain

**eFigure 4.** NDM Epicentres Using Null-Rewire Benchmarks (Top) and NDM Benchmarks Which Do Not Preserve Distance Rules (Bottom)

**eFigure 5.** Replication of Results After Excluding Patients With Nonschizophrenia Diagnosis

**eFigure 6.** Replication of Results Using Representative Structural and Functional Connectomes From the First Episode Psychosis (STAGES) Patient Population

**eFigure 7.** Replication of Results Using Alternative Representative Structural and Functional Connectomes

**eFigure 8.** Replication of Results Using Voxel-Based Morphometry

**eFigure 9.** Replication of Results Applying Global Signal Regression to FC Data

**eFigure 10.** Replication of Results Using Representative Structural and Functional Connectomes From an Older Subset of the Independent Healthy Controls

**eReferences.**

This supplementary material has been provided by the authors to give readers additional information about their work.

## eMethods 1. Description of Each Data Set Used

### *STAGES (First Episode Psychosis; FEP)*

We recruited 62 people aged 15-25 years (46% female) who were experiencing FEP. All patients had minimal previous exposure to antipsychotic medication (<7 days of use or lifetime 1750 mg chlorpromazine equivalent exposure) and a duration of untreated psychosis of less than 6 months. At baseline, patients were randomised to one of two groups: one given antipsychotic medication (risperidone or paliperidone) plus intensive psychosocial therapy and the other given placebo plus intensive psychosocial therapy. For both groups, the treatment period spanned 6-months. MRI was conducted at baseline, 3 months, and 12 months post-intake. The randomisation phase of the study terminated at 6 months, so patients in either the antipsychotic or placebo group could have received antipsychotic medication and ongoing psychosocial interventions after 6 months. In practice, four patients in the placebo group commenced antipsychotic medication in this intervening period, in addition to the four patients who had commenced at the 3-month timepoint. Thus, between the 3-month and 12-month scan, a total of eight patients in the placebo group commenced antipsychotic medication and were removed from the analysis. All patients in the antipsychotic continued medication with varying degrees of exposure. To ensure that our results were not dependant on inclusion of patients without schizophrenia, we repeated the primary analysis after only including individuals diagnosed with schizophrenia or schizophreniform disorder (see *Robustness analyses & Supplement 1L*).

A matched healthy control group comprising 27 individuals with no history of psychiatric or neurological diagnosis was also recruited and scanned alongside the patient groups. Demographic details of this sample are provided in Table 1. Further sample characteristics and details about research and safety protocols can be found elsewhere<sup>1,2</sup>. Ethical approval for the study was granted by the Melbourne Health Human Research Ethics Committee (MHREC:2007.616).

Due to the complexity and practical challenges of conducting a prospective triple-blind randomised control MRI study in antipsychotic-naïve patients, the sample size of this longitudinal FEP sample is small (see also<sup>3,4</sup> for a discussion of the representativeness of this sample). Replication of our longitudinal analyses in larger samples is thus warranted.

### *Human Connectome Project Early Psychosis (Early Psychosis; EP)*

This ongoing study is acquiring brain MRI in a cohort of people with a psychosis-spectrum disorder and within the first 3 years of the onset of psychotic symptoms. The dataset also includes healthy control participants and the data release used here (Release 1.1) comprises 140 patients and 63 controls. All subjects are scanned across three sites based in the USA. Detailed inclusion and exclusion criteria for the dataset is described elsewhere<sup>5</sup>. In the current study, we used a subset of 121 patients and 57 controls who passed quality control and had complete and useable data. To ensure that our results were not dependant on inclusion of patients without schizophrenia, we repeated the primary analysis after only including individuals diagnosed with schizophrenia or schizophreniform disorder (see *Robustness analyses & Supplement 1L*).

### *BrainGluSchi (Schizophrenia; SCZ-BGS)*

This is a publicly available dataset of brain MRI in a sample of 86 patients diagnosed with schizophrenia and 89 matched healthy controls. Additionally, all patients who were being treated with antipsychotics had to have been clinically stable on the same medications for >4 weeks. All patients were recruited from the University of New Mexico (UNM) Hospitals and all subjects were scanned at a single site. Detailed inclusion and exclusion criteria for the dataset is described elsewhere<sup>6</sup>. In the current study, we used a subset of 70 patients and 62 controls who passed quality control and had complete and useable data.

### *COBRE (Schizophrenia; SCZ-COBRE)*

This is a publicly available dataset of brain MRI in a sample of 99 patients diagnosed with schizophrenia and 99 matched healthy controls. Additionally, all patients had to demonstrate retrospective and prospective clinical stability during three consecutive weekly visits and during each imaging assessment. All patients were scanned at a single site. Detailed inclusion and exclusion criteria for the dataset is described elsewhere<sup>7</sup>. In the current study, we used a subset of 66 patients and 72 controls who passed quality control and had complete and useable data.

### **Independent healthy control sample**

We recruited a total of 356 healthy participants as part of a study conducted at Monash University, Australia. The participants were selected from a large cohort of 439 people as those with high-quality functional and diffusion MRI scans available. For further details, see Sabaroedin, et al.<sup>8</sup>. The study was conducted in accordance with the Monash University Human Research Ethics Committee (MUHREC: 2012001562).

## **eMethods 2. MRI Acquisition Parameters**

### *STAGES (First Episode Psychosis; FEP)*

Structural T1-weighted (T1w; MPRAGE) scans were acquired using a 3-T Siemens Trio Tim scanner with a 32-channel head coil at the Royal Children's Hospital in Melbourne, Australia. Image acquisition parameters at each timepoint were as follow: 176 sagittal slices, with a 1mm<sup>3</sup> voxel size, bandwidth 236 Hz/pixel, field of view (FOV) =256×256, matrix = 256×256×176, repetition time (TR)= 2300ms, echo time (TE) = 2.98ms and a 9° flip angle.

### *Human Null<sub>rewire</sub> Project Early Psychosis (Early Psychosis; EP)*

Structural T1w (MPRAGE) scans were acquired using 3-T Siemens MAGNETOM Prisma scanners across three sites: Brigham and Women's Hospital, McLean Hospital, and Indiana University in USA. Brigham and Women's Hospital and Indiana University used a 32-channel head coil. McLean Hospital used a 64-channel head & neck coil, with the neck channels turned off. Image acquisition parameters were as follow: 208 sagittal slices, with a 0.8mm<sup>3</sup> voxel size, bandwidth 220 Hz/pixel, FOV =256×256, matrix = 256×256×208, TR = 2400ms, TE=2.22ms and flip angle = 8°.

### *BrainGluSchi (Schizophrenia; SCZ-BGS) & COBRE (Schizophrenia; SCZ-COBRE)*

Structural T1w multi-echo MPRAGE scans were acquired using a 3-T Siemens TrioTim scanner with a 12-channel head coil at Our Mind Research Network in New Mexico, USA. Image acquisition parameters were as follow: 176 sagittal slices, with a 1mm<sup>3</sup> voxel size, bandwidth 650 Hz/pixel, FOV =256×256, matrix = 256×256×176, TR = 2530ms, number of echo's = 5, TE=[1.64, 3.5, 5.36, 7.22, 9.08] ms and flip angle = 7°. The final image used for analysis was computed as the root mean square of the 5 images corresponding to each echo.

### *Independent healthy control sample*

Structural, diffusion and functional MRI data were acquired using a Siemens Skyra 3T scanner with a 32-channel head coil at Monash Biomedical Imaging in Melbourne, Australia. T1w structural scans were acquired using: 1 mm<sup>3</sup> isotropic voxels, TR = 2300ms, TE = 2.07ms, TI = 900ms, and a FOV of 256 mm.

Diffusion data were acquired using an interleaved acquisition with the following parameters: 2.5 mm<sup>3</sup> voxel size, TR = 8800ms, TE = 110ms, FOV 240 mm, 60 directions with b = 3000 s/mm<sup>2</sup>, and seven b = 0 s/mm<sup>2</sup> vol. In addition, a single b = 0 s/mm<sup>2</sup> was obtained with reversed phase encoding direction for susceptibility field estimation.

Multiband T2\*-weighted whole-brain echo-planar images were acquired with a total of 620 functional volumes with 42 slices each were acquired per participant using an interleaved acquisition with the following parameters: TR = 754ms, TE = 21 milliseconds, flip angle of 50°, multiband acceleration factor of 3, FOV = 190mm, slice thickness of 3mm, and 3mm isotropic voxels. Participants were instructed to lie still in the scanner with eyes closed while maintaining wakefulness.

## **eMethods 3. DBM Processing**

Prior to processing, raw T1w scans were visually examined for artefacts and then subjected to an automated quality control procedure<sup>9</sup>. In the FEP, EP, SCZ-BGS and SCZ-COBRE datasets, three, eight, six and four patient scans did not pass image quality control, respectively, and were excluded due to artefacts. The remaining scans were processed using the deformation-based morphometry (DBM) pipeline of the Computational Anatomy Toolbox (version r1113)<sup>10</sup> for the Statistical Parametric Mapping 12<sup>11</sup> software running in MATLAB version 2019a. We used DBM to quantify volume changes because it does not require tissue segmentation, requires less spatial smoothing<sup>12</sup> than voxel-based morphometry (VBM) and to be comparable to previous work<sup>13,14</sup>. However, we replicated our primary findings using VBM (see *Robustness Analyses & Supplement 1L*).

For each participant, all scans were put through a spatial adaptive non-local means denoising filter, followed by internal resampling, bias correction, affine registration and the standard *SPM12* ‘unified segmentation’. After these initial pre-processing steps, the T1w images from all available timepoints were rigidly realigned to correct for differences in head position within-subject, and a subject-specific mean image was calculated and used as a reference in a subsequent realignment of all T1w images across all timepoints. The mean images were then normalised using the Diffeomorphic Anatomical Registration using Exponentiated Lie algebra algorithm (DARTEL; <sup>15</sup>). The resulting spatial normalisation parameters were then applied to the bias-corrected individual images for all available timepoints. These native space images were then again realigned to a DARTEL normalised template, resulting in a voxel-wise map of Jacobian determinants, where the intensity of each voxel quantifies the amount of expansion or contraction required for registration to the template and a 3-mm FWHM smoothing kernel was applied to the Jacobian maps.

#### **eMethods 4. Grey Matter Volume Change Contrasts**

To map spatial patterns of group-level cross-sectional and longitudinal volume change, we used a robust marginal model implemented in the Sandwich Estimator Toolbox<sup>16</sup>, which combines ordinary least squares estimates of parameters of interest with estimates of variance/covariance based on a robust sandwich estimator, thus accounting for within-subject correlations in longitudinal studies. This method is asymptotically robust to misspecification of the covariance model and does not depend on the assumptions of common longitudinal variance structure across the whole brain. All contrasts were adjusted for age, sex, and handedness, with site additionally included for the EP dataset.

We conducted cross-sectional contrasts in each of the four patient datasets to capture cross-sectional GMV differences between patients and controls (Fig1A). The cross-sectional contrast for the FEP sample compared healthy controls with patients at baseline, prior to initiation of either placebo or antipsychotic treatment. Longitudinal GMV changes were mapped in the FEP dataset (Fig1A) to isolate: (1) illness-related change over time, by comparing GMV changes over time in the placebo group to matched healthy controls; and (2) antipsychotic-related changes over time, which compared GMV changes in the medication group to both the placebo group and matched healthy controls. The inclusion of the placebo group in this contrast ensures that the contrast detects changes in medicated patients that differ from both antipsychotic-naïve patients and healthy controls, thus isolating the effects of antipsychotic treatment most relevant to psychosis (see also Chopra, et al. <sup>3</sup>). Longitudinal contrasts were assessed from baseline to 3 months and baseline to 12 months, with a linear contrast used for the latter. Longitudinal contrasts also included both cross-sectional and longitudinal effects of age as covariates<sup>16</sup>.

Cross-sectional contrasts were specified such that positive values in the resulting voxel-wise *t*-statistic maps indicate lower volume in patients compared to controls. For the illness-related longitudinal contrasts, positive values in the resulting voxel-wise *t*-statistic maps indicate greater longitudinal GMV decline in placebo patients compared to controls. For the medication-related longitudinal contrasts, positive values in the resulting voxel-wise *t*-statistic maps indicate greater longitudinal GMV decline in medicated patients compared to both the placebo patients and controls. The *t*-statistics were converted to *z*-scores, and we applied the CDM to unthresholded *z*-maps encoding regional GMV changes, as we are interested in capturing the complete spatial pattern of GMV differences across the entire brain, not just the changes which survive a statistical threshold. Renderings of the unthresholded *t*-maps can be found in Fig1A-C and Fig2A-B. FDR-corrected and uncorrected voxel-level *t*-statistic maps for each contrast are provided in the Supplements1G-H. We clarify that our primary goal here is to model the processes that can explain spatial patterns of GMV loss in psychosis, not merely to map these changes.

To relate grey-matter alterations to connectome architecture, we parcellated the brain into 300 discrete cortical regions of approximately equal size<sup>17</sup>, in addition to 32 subcortical areas<sup>18</sup>, using previously validated atlases. The volume change for each region was estimated as the mean *z*-statistic of all voxels corresponding to that region. The regions comprise the nodes of a network, which can then be directly related to measures of inter-regional SC and FC.

## eMethods 5. DWI Processing

We first implemented the *tractoflow*<sup>19</sup> pipeline, where the DWI data are denoised using the *dwidenoise* tool from *MRtrix3* and then skull-stripped using *FSL bet*. A N4 bias corrections then applied using *ANTs*<sup>20</sup> and the image was cropped using *Dipy*<sup>21</sup>. The *dwinormalise* tool from *MRtrix3*<sup>22</sup> was used to normalise the mean values in each image to approximately 1000. Data were then resampled to 1 mm isotropic spatial resolution and the *Dipy TensorModel* was used to estimate the Diffusion Tensor Image<sup>23</sup> at every voxel, with a weighted least squares method. The *csdeconv* package from *Dipy* was used to compute fibre orientation distributions (FOD), which represents the estimated orientation distribution of fibre structure at each voxel<sup>24,25</sup>. Peaks representing main diffusion directions were extracted from local maxima of each FOD's angular distribution. This FOD field was later used for tractography and to estimate the structural connectivity.

The T1w data were processed using the same protocol as DWI data for denoising, N4 bias correction, resampling, brain extraction, and cropping. The T1w data were then registered to the b0 image using non-linear *ANTs*<sup>20</sup>. Segmentation of grey matter, white matter, subcortex and cerebrospinal fluid was performed using *CIVIT*<sup>26</sup>, and the resulting tissue partial volume estimate maps were used to compute the inclusion and exclusion masks as well as a grey/white matter interface mask used for seeding<sup>19</sup>.

Probabilistic tracking was performed using a particle filtering tractography algorithm<sup>27</sup> implemented in *Dipy*. Similar to anatomically constrained tractography<sup>28</sup>, particle filtering tractography takes advantage of previously computed tissue maps to define areas where streamline can traverse. We set the maximum streamline length to 400mm and generated 10,000,000 streamlines. Default parameters were used for other local tracking options (step size = 0.5; maximum angle between 2 steps: 20)<sup>29</sup>. To create a SC matrix, streamlines were assigned to each of the closest regions in the parcellation within a 2-mm radius of the streamline endpoints<sup>22</sup>, yielding undirected 332 × 332 connectivity matrices for all subject.

Importantly, most tractography algorithms are prone to false positives and do not directly index the quantitative strength of connections between pairs of regions<sup>30,31</sup>. We therefore implemented a state-of-the-art optimisation procedure, Convex Optimization Modelling for Microstructure Informed Tractography (COMMIT2), which has shown to be superior to other methods on key benchmarks derived from fibre-tracking phantoms<sup>32</sup>. COMMIT2 uses a forward model to recover the connectome with the minimum number of bundles that best explains the local axon density estimated from the DWI signal<sup>32</sup>. In doing so, COMMIT2 filters and re-weights pair-wise connections strengths and provides more biologically accurate quantitative estimates of connectivity. After optimised SC matrices were generated for each subject, we created a single group-average matrix by retaining connections if they appeared in at least  $\tau$  subjects, where  $\tau$  is the consensus threshold that results in a binary density comparable to that of a typical subject<sup>33</sup>, and which was set to 38.6% for this sample. This threshold is computed separately for inter-/intra-hemispheric connections. Retained connections are assigned the corresponding group-average SC weight, resulting in a weighted group-average SC matrix. Finally, the SC weights from the group-average matrix were z-scored.

## eMethods 6. fMRI Processing

First, the fMRI data for each subject were processed in *FSL FEAT*<sup>34</sup> following a standard pipeline, which included removal of the first four volumes, rigid-body head motion correction, 3mm spatial smoothing to improve signal-to-noise ratio, and high-pass temporal filter of 75s to remove slow drifts. Subsequently, spatial independent component analysis was performed using *FSL MELODIC*<sup>35</sup>. These components were used as inputs for *FSL FIX*<sup>36,37</sup> an ICA-based denoising approach that uses an automated classifier to identify noise components and remove them from the data. This approach has been shown to successfully correct for motion and physiological noise, in addition to artifacts associated with multiband acceleration<sup>37</sup>. The *FSL-FIX* classifier was trained using an independent cohort of 25 individuals (13 males; mean age = 25.56 years), acquired using identical scanner and acquisition protocol, in which each of over 2000 components were manually labelled as signal or noise. The accuracy of the classifier in identifying nuisance components was verified in a subset of 15 individuals from our sample, yielding an accuracy estimate of 97%.

The time courses of components labelled as noise were used as nuisance regressors, along with 24 head motion parameters (6 rigid-body parameters, their backwards derivatives, and squared values of the 12 regressors). Given ongoing controversy around the application of global signal regression<sup>38</sup>, we evaluated how this step affected our findings (see *Robustness analyses*). Denoised functional data were spatially normalized to the International

Consortium for Brain Mapping 152 template in Montreal Neurological Institute (MNI) space using ANTs<sup>20</sup>, via a three step method: 1) registration of the mean realigned functional scan to the skull-stripped high resolution anatomical scan via rigid-body registration; 2) spatial normalization of the anatomical scan to the MNI template via a nonlinear registration; and 3) normalization of functional scan to the MNI template using a single transformation matrix that concatenates the transforms generated in steps 1 and 2. We then computed whole brain FC matrices for each subject using pair-wise Pearson correlations between the timeseries from each of the 332 regions and took a mean FC matrix across the sample.

## eMethods 7. FDR-Corrected and -Uncorrected Voxel-Level DBM $t$ Statistic Maps for Each Contrast

### A) STAGES (first episode psychosis)

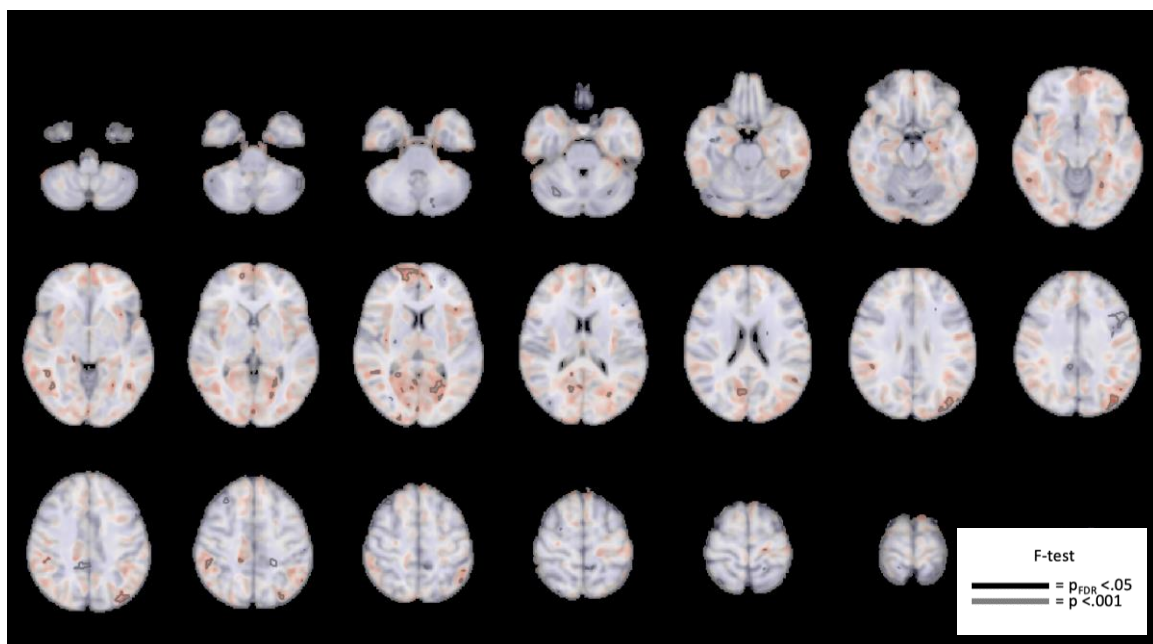

### B) HCP-EP (Early psychosis)

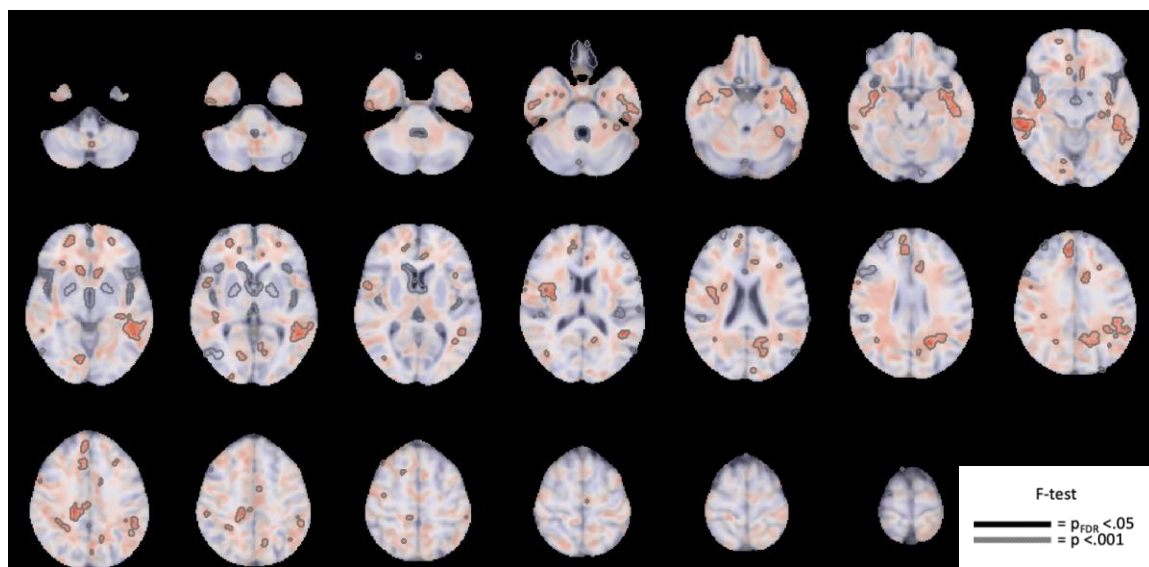

C) BrainGluSchi (schizophrenia)

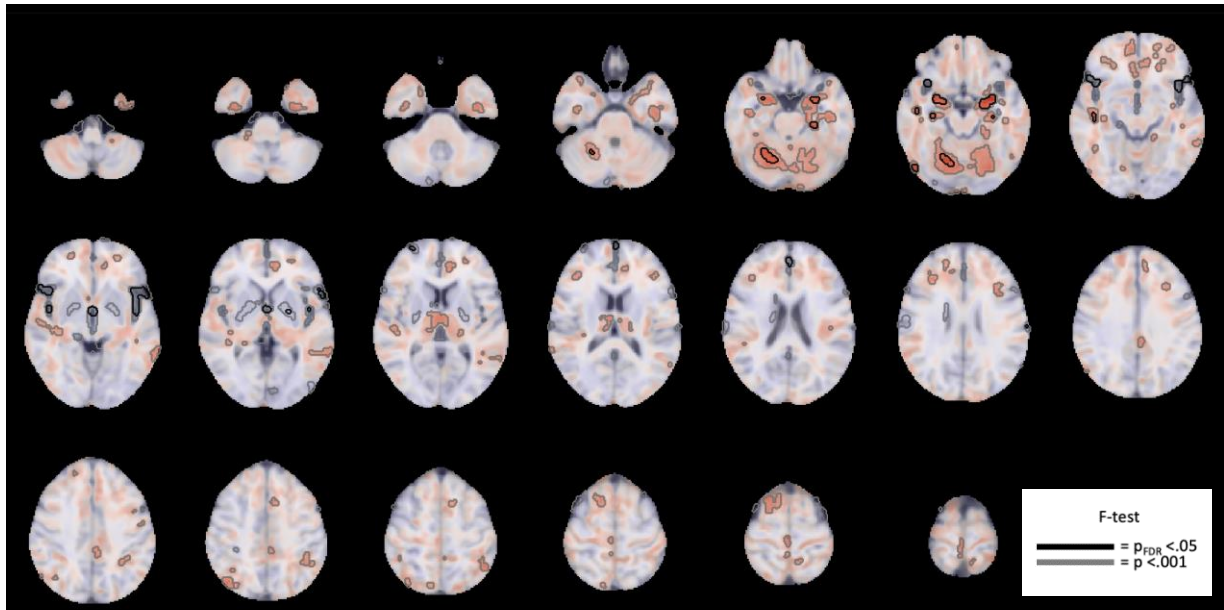

D) COBRE (schizophrenia)

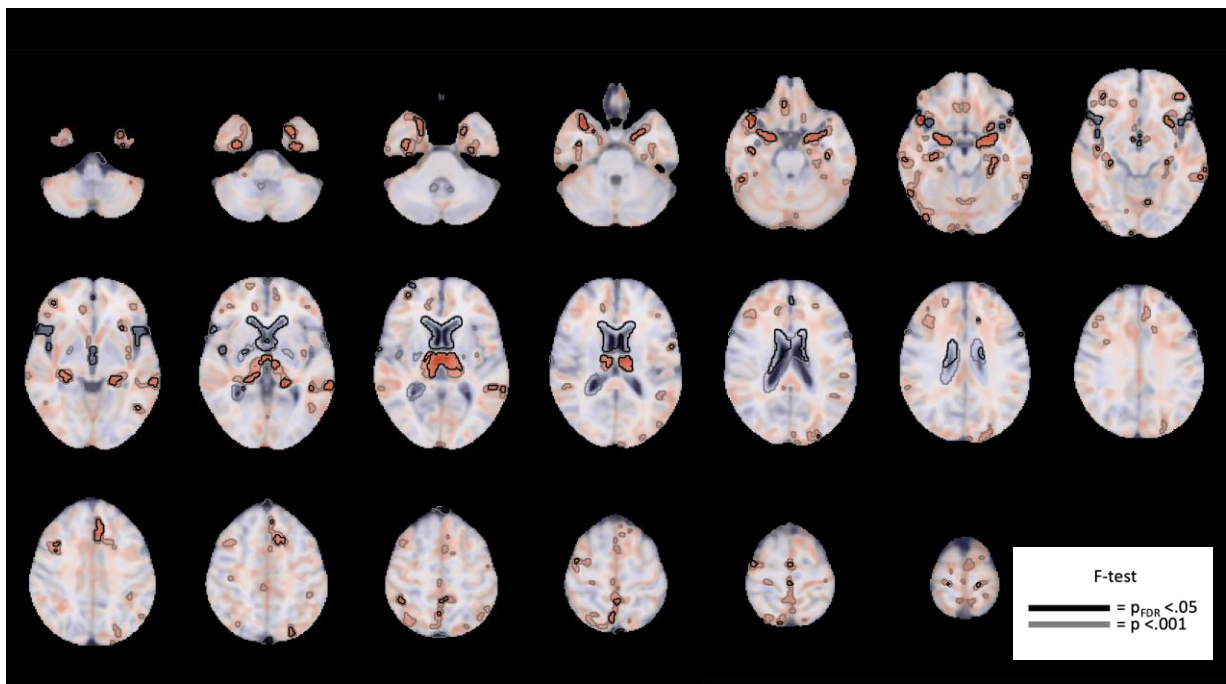



**eMethods 8.** FDR-Corrected and -Uncorrected Voxel-Level VBM *t* Statistic Maps for Each Contrast

A) STAGES (first episode psychosis)

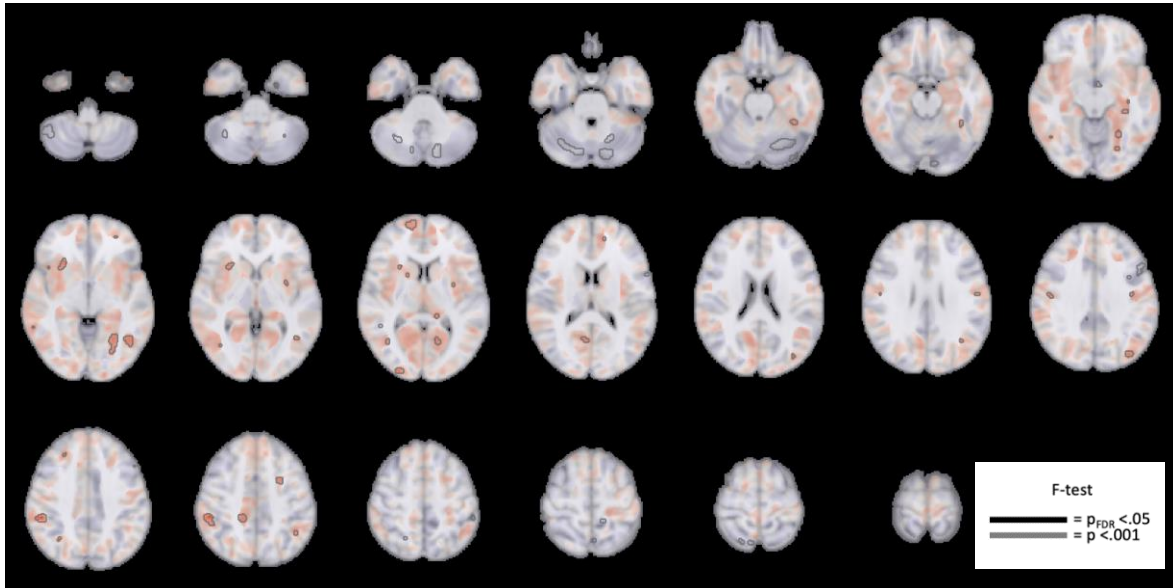

B) HCP-EP (Early psychosis)

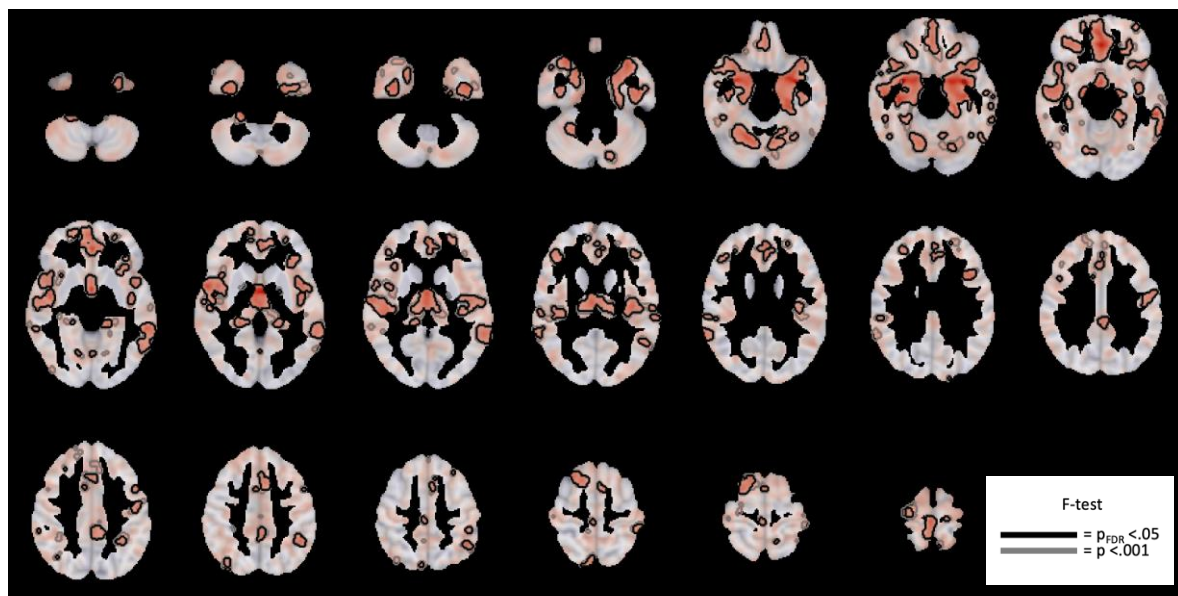

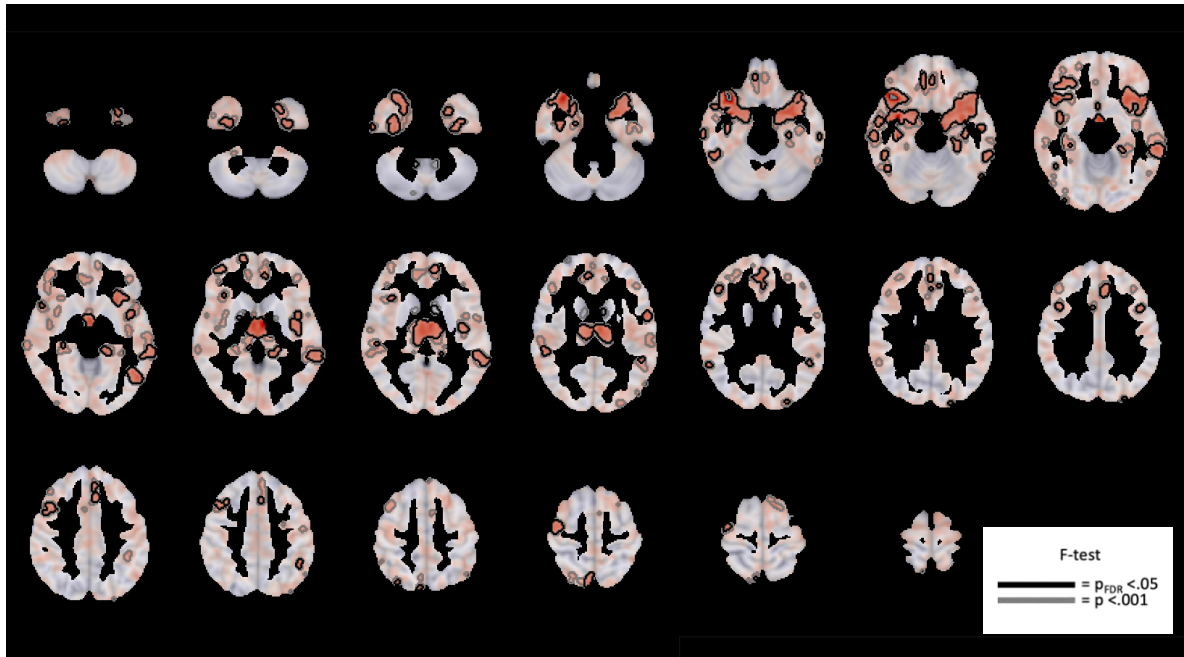

D) COBRE (schizophrenia)

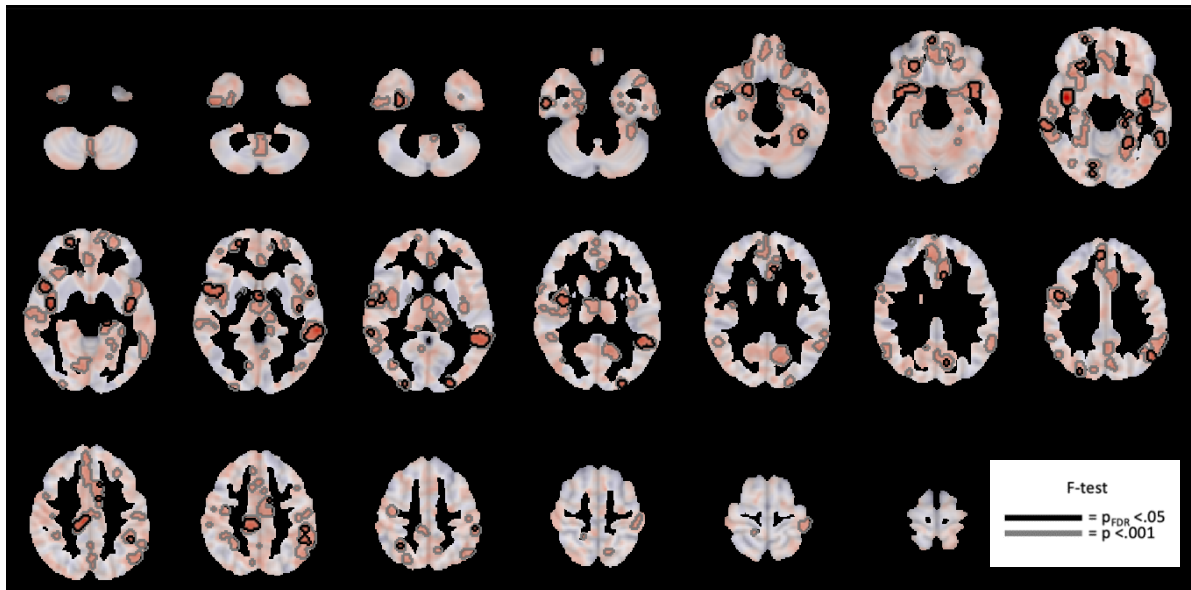

## eMethods 9. Benchmark Null Models for the Coordinated Deformation Model (CDM)

Model performance was evaluated with respect to three null benchmark models. The first (Fig. 1D; Null<sub>smash</sub>) and second (Fig. 1D; Null<sub>spin</sub>) null models evaluated whether the observed findings were specific to the empirically observed pattern of grey matter deformations or were a generic property of the intrinsic spatial structure of the deformation maps. The two models differ in the way in which they account for the spatial structure present in the data. The first, Null<sub>smash</sub> approach used a parametric model to capture the spatial structure. Specifically, it relies on spatial variogram modelling to generate 1000 random spatial maps with a similar spatial autocorrelation to the observed deformation map, as implemented in the freely available toolbox *BrainSMASH*<sup>39</sup>; and with parameters ( $ns=500$ ;  $knn=2300$ ;  $pv=70$ ) which resulted in null maps with variograms as close as possible to the empirical variogram across all contrasts. The second null benchmark, termed Null<sub>spin</sub>, uses a spin-test to rotate region-level cortical  $t$ -values 1000 times<sup>40</sup>. The rotation was applied to one hemisphere and then mirrored for the other hemisphere. This benchmark is referred to as the Null<sub>spin</sub> null throughout the manuscript.

The primary advantage of the model-based method is that it can be applied to both cortical and subcortical data, however, it is not guaranteed to match the precise spatial autocorrelation of the empirical data. The spin test exactly preserves the empirical values and their spatial autocorrelation but is only applicable to cortex and also relies on certain approximations to account for the medial wall. In both cases, the 1000 surrogate values were used for inference on the observed performance metrics, with  $p$ -values quantified as the fraction of null values exceeding the observed correlation.

The third null model (Fig. 1D; Null<sub>rewire</sub>) involved rewiring the structural connectome while preserving the degree sequence and length-weight relationship, and approximately preserving the edge-length distribution<sup>41</sup>. We used 10 distance bins and 50,000 edge swaps to generate 1000 rewired networks. These surrogate networks were used to test the hypothesis that any apparent network-based prediction of local grey matter change is specific to the actual topology of the connectome itself, and cannot be explained by basic network properties, such as regional variations in node degree or the spatial dependence of inter-regional connectivity. This benchmark null is referred to as the Null<sub>rewire</sub> null throughout the manuscript.

## eMethods 10. Further Information Network Diffusion Model (NDM) and Benchmark Null Models

The CDM model allowed us to determine whether brain connectivity shapes the spatial pattern of GMV alterations and whether SC or FC represents a stronger constraint on such patterns. However, it does not directly evaluate the mechanisms that link connectivity and GMV change, and it cannot identify whether individual regions act as sources or epicentres of volume loss. The NDM more directly tests the spreading hypotheses by simulating a passive diffusion process to model the spread of GMV alterations from specific seed regions. Thus, the NDM tests both the mechanism of spread, as well as the likely source, or epicentre, from which the spread may initiate. We therefore seeded the NDM using each of the 332 individual brain regions as a seed region for each seed region and each DBM contrast map (Fig1A), resulting in a total of 2656 simulations (332 regions  $\times$  8 contrasts). For each simulation, the measure of accuracy used to evaluate the NDM was the maximum correlation obtained across different time steps of the diffusion process ( $r_{max}$ ; Fig4A) between the log-transformed simulated and observed GMV loss. Note that, in principle, the NDM could be initialized using any combination of seed regions<sup>42,43</sup>, but this can quickly result in a combinatorial explosion of alternative initial conditions for the model so we focused on testing specific hypotheses about individual brain regions as putative sources of GMV loss.

Consistent with prior work<sup>42,43</sup>, model performance was evaluated as the Pearson correlation between the predicted diffusion and observed volume abnormalities at each time step and for each seed, with the maximum correlation (Fig4A;  $r_{max}$ ) across all time steps being retained. The observed regional  $t$ -statistics were rescaled to a more interpretable non-negative quantity via a log-transformation, yielding values in the range [0,1]<sup>42-44</sup>. The seed region was excluded when correlating predicted and observed volume abnormalities to ensure that our analysis was not influenced by large volume abnormalities in the seeds. Performance was evaluated separately for each hemisphere, but the family-wise error correction described below was evaluated across the whole brain and combined for both hemispheres when evaluating statistical significance of each brain region as an epicentre.

To evaluate the statistical significance of each region's  $r_{max}$ , we generated a null distribution of  $r_{max}$  values using two benchmark models: the Null<sub>smash</sub> and the Null<sub>rewire</sub> null (see supplement section 1I for more information). The Null<sub>spin</sub> benchmark was not used to evaluate the NDM as it does not include subcortical regions. To generate null  $r_{max}$  values for each contrast using the Null<sub>smash</sub>, we initiated the NDM from each brain region 1000 times and evaluated the correlation between the simulated GMV loss and the spatially constrained null GMV loss generated by the Null<sub>smash</sub>. The  $r_{max}$  from each iteration was retained, resulting in 1000 null  $r_{max}$  values at each brain region. For each contrast and each brain region, the p-value was considered as the percentage of nulls  $r_{max}$  null values greater than the observed  $r_{max}$ . To implement family-wise error (FWE) correction, for each contrast, the maximum brain-wide null  $r_{max}$  from each of the 1000 iterations was used to construct a FWE-corrected null distribution<sup>45</sup>. The FWE-corrected p-value was considered as the percentage of FWE-corrected null  $r_{max}$  values greater than the observed  $r_{max}$ . To evaluate significance using the Null<sub>rewire</sub> null model, we followed the same procedure describe above, but instead of varying the GMV volume loss, we varied the structural connectome at each of the 1000 iterations, using null connectomes generated using a rewiring method (Supplement section 1.8).

For most contrasts, the Null<sub>smash</sub> and Null<sub>rewire</sub> nulls identified consistent epicentres, although the connectome-based null benchmarks were more conservative in the analysis of longitudinal GMV change in the FEP sample, revealing a more circumscribed set of prefrontal regions compared to the Null<sub>smash</sub> benchmark. To understand the reasons for this discrepancy, we re-ran the epicentre analyses using a variant of the Null<sub>rewire</sub> null model that did not preserve the distance dependence of connectivity (FigS5), but still maintained other topological properties such as the node degree and edge-weight distributions<sup>46</sup>. The results were consistent with those obtained using the Null<sub>smash</sub> null (Fig4G-H) and implicated widespread frontal regions as epicentres of longitudinal GMV change. Thus, because these additional prefrontal regions emerge only when connection topology, but not the spatial dependence of connectivity, is preserved, their role as epicentres of longitudinal GMV change is largely due by their spatial proximity to the epicentres identified in the Null<sub>rewire</sub> analysis (Fig S4) rather than their profile of inter-regional connectivity.

**eFigure 1. Sample-Level Associations Between Model Performance and Illness Duration and Severity**

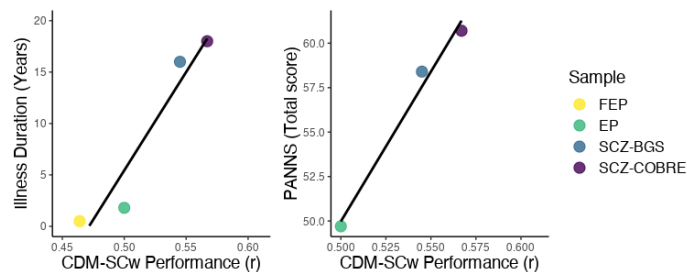

Using multiple samples spanning different stages of psychosis allows us to relate sample-level illness duration and severity measures with CDM<sub>SCw</sub> model performance. To assess the significance of these associations, we implemented a permutation procedure where, for each sample, the group labels (patient/control) were resampled without replacement and used to generate 1000 null t-statistic maps for each dataset. Then, by applying the CDM<sub>SCw</sub> model to these null maps, we generated a null distribution of sample-level correlations between illness duration/severity and CDM<sub>SCw</sub> model estimates. Model performance was significantly correlated with both illness duration ( $r=.958$ ;  $p= 0.022$ ) and illness severity ( $r=.991$ ;  $p=.041$ ; PANSS not available for FEP sample), suggesting that longer duration and higher severity of illness may be associated with a more profound manifestation of a spreading process, as captured by our CDM<sub>SCw</sub> model. However, given the small number of samples used in thesis analysis, further replication is warranted.

## eMethods 11. Data-Driven Epicentre Mapping Methods

As per Shafiei, et al.<sup>13</sup>, we also implemented a data driven epicentre approach which defined such epicentres as areas showing high deformation that were also connected to regions showing high deformation. To identify such regions, for each region and each contrast, we rank-transformed and then took the mean of two values: (1) that region's extent of deformation; and (2) the mean of that region's neighbours' deformation, weighted by SC as in the CDM<sub>SCw</sub> model, given the superior performance of this model (see *Results*). Higher positive values on the

resulting epicentre rank represent regions with high volume loss that are also connected to regions with high volume less. We then obtained a null ensemble of 1000 regional epicentre scores by repeating the same procedure after either rotating the regional deformation maps relative to the structural connectome to generate a distribution of null ranks at each region (Null<sub>spin</sub> benchmark). These 1000 null values were then used to quantify statistical significance of each region's epicentre score as the fraction of null values exceeding the observed rank score for a given regions (FigS2) <sup>45</sup>. We also characterised data driven epicenters using Null<sub>smash</sub> and Null<sub>rewire</sub> nulls (FigS2).

Using this data-driven epicentre mapping approach, Shafiei, et al. <sup>13</sup> identified the anterior cingulate as a putative epicentre of cross-sectional volume differences in people with established schizophrenia. Our findings only identified the anterior cingulate as an epicentre of longitudinal change in the FEP cohort. This discrepancy may be due to our reliance on the CDM<sub>SCW</sub> model, which was the best predictor of GMV differences, whereas Shafiei, et al. <sup>13</sup> did not consider structural connectivity weights. Moreover, they did not consider regions outside neocortex, which we found are associated with the strongest and most consistent effects.

**eFigure 2. Data-Driven Epicentre Region Identification Using Different Null Models**

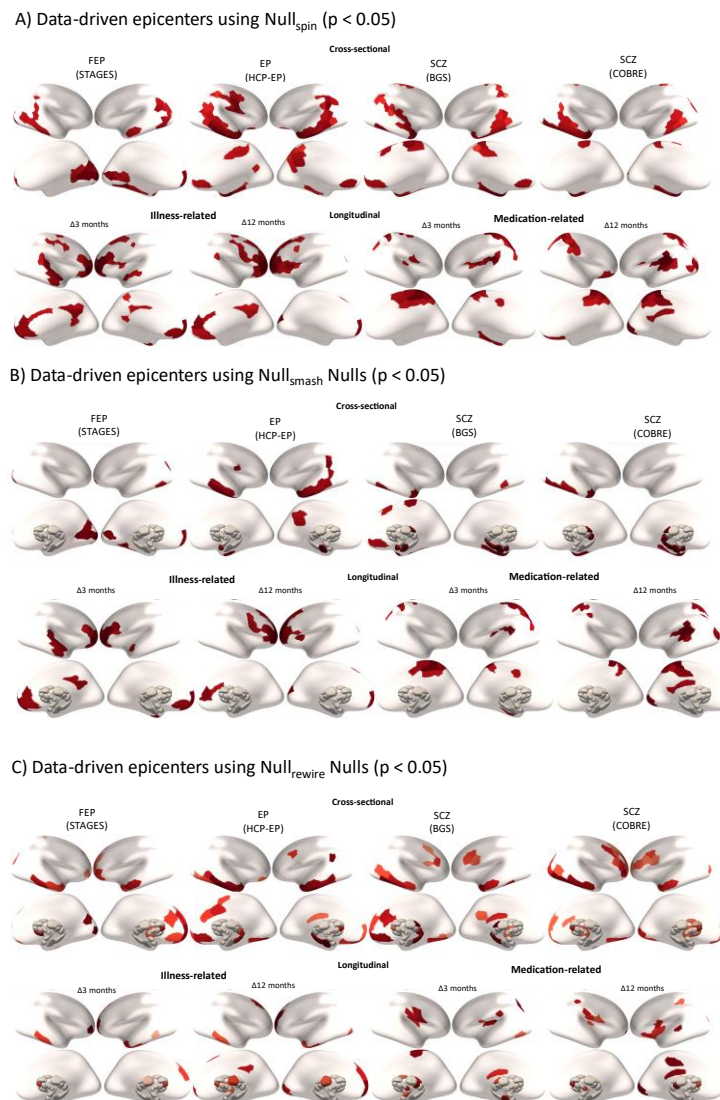

**eFigure 3.** Scatterplots of Observed and Estimated GMV Alterations Using the Best Seed Across the Whole Brain

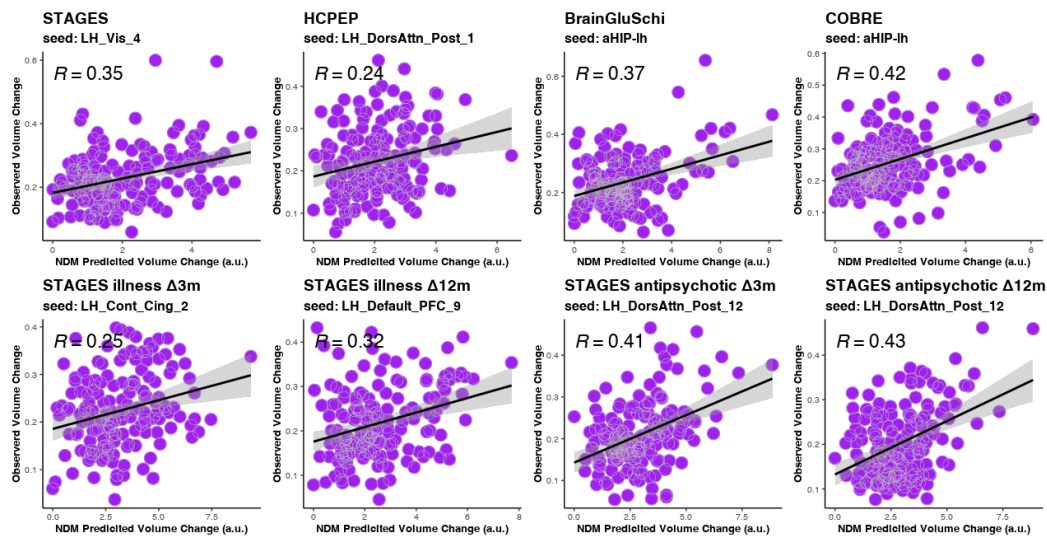

**eFigure 4.** NDM Epicentres Using Null-Rewire Benchmarks (Top) and Null-Rewire Benchmarks Which Do Not Preserve Distance Rules (Bottom).

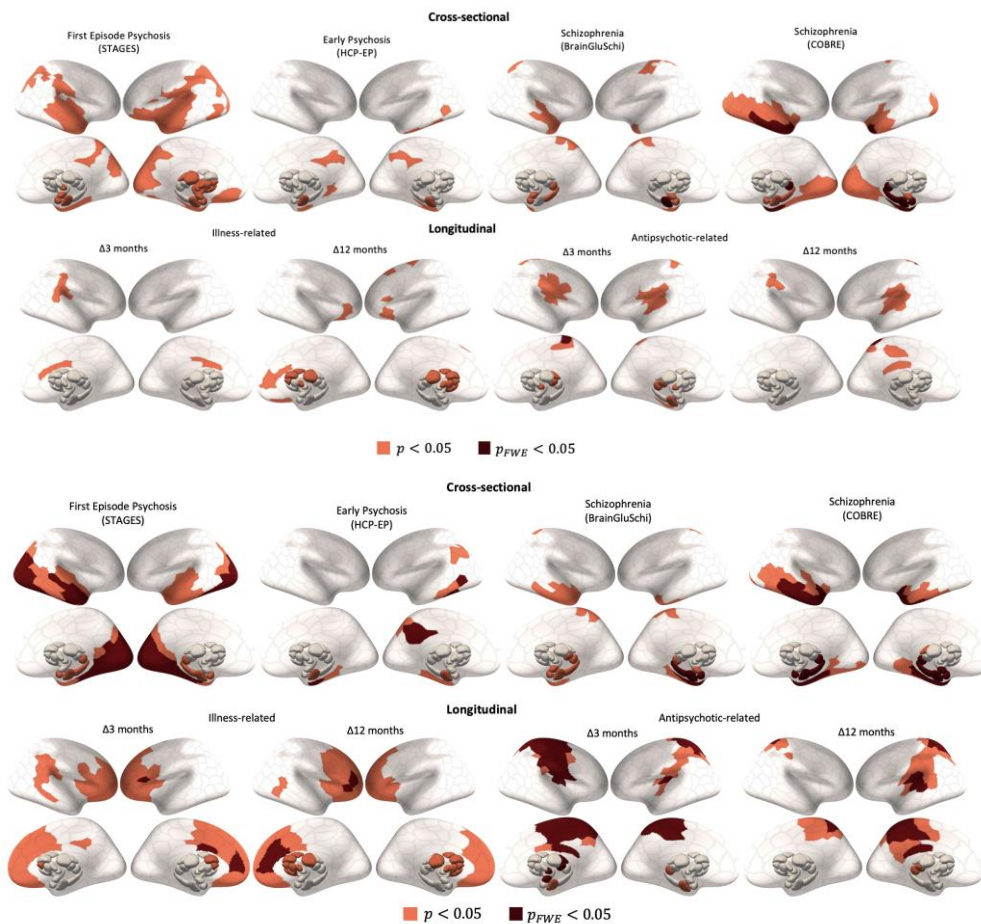

## eMethods 12. Robustness Analyses

The magnitude and pattern of results remained consistent with our original findings after only considering individuals diagnosed with schizophrenia or schizophreniform disorder, indicating that diagnostic heterogeneity of the FEP and EP samples did not substantially impact our findings (FigS6).

To ensure that the wide-spread changes in white-matter integrity often reported in patients<sup>47-50</sup> did not affect model estimates of the network-based spread of pathology, we replicated our findings using structural and functional connectomes derived from the FEP patient sample rather than the independent healthy control sample (FigS7). We also replicated the results using a representative structural connectome derived from the healthy control sample in the FEP study (FigS8), and an older subset of our independent healthy control sample ( $n=31$ ;  $age=36.06\pm 4.9$ ) that was more closely matched in age to the two established schizophrenia samples (FigS11).

We re-ran the  $CDM_{FCw}$  model including FC estimates between all pairs of regions to ensure that the limited performance of the FC-based model was not driven by our restricting this model to only consider structurally connected region pairs. The unrestricted model showed superior performance compared to the original  $CDM_{FCw}$  model only in predicting medication-related changes at 3-months ( $r = .46$ ) and 12-months ( $r = .42$ ). However, the unrestricted model was not statistically significant in any of the samples or for any of the contrasts (*all*  $p > .05$ ) and its performance was inferior to the  $CDM_{SCw}$  model in all cases.

Finally, our findings were consistent when using VBM instead of DBM (FigS9), and when applying global signal regression (GSR) on subject-level FC matrices before computing the group average FC matrix (FigS10).

**eFigure 5.** Replication of Results After Excluding Patients With Nonschizophrenia Diagnosis

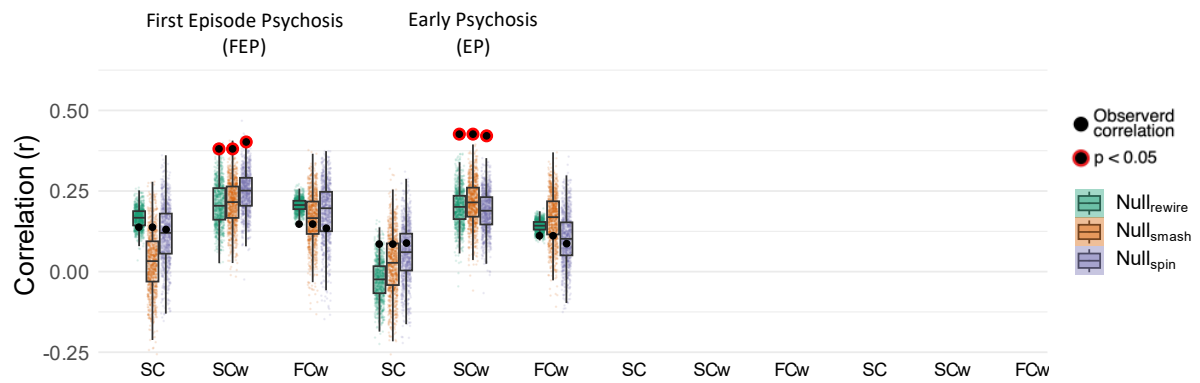

**eFigure 6.** Replication of Results Using Representative Structural and Functional Connectomes From the First Episode Psychosis (STAGES) Patient Population

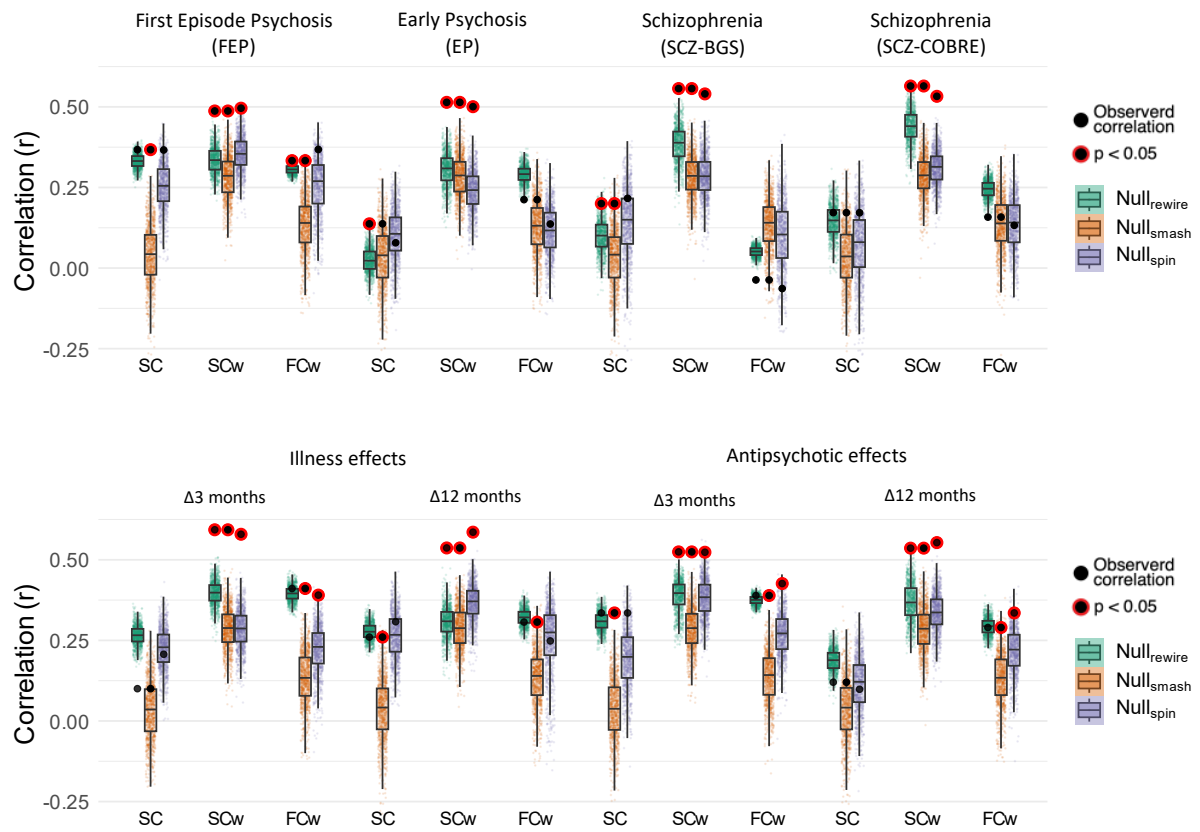

**eFigure 7.** Replication of Results Using Alternative Representative Structural and Functional Connectomes



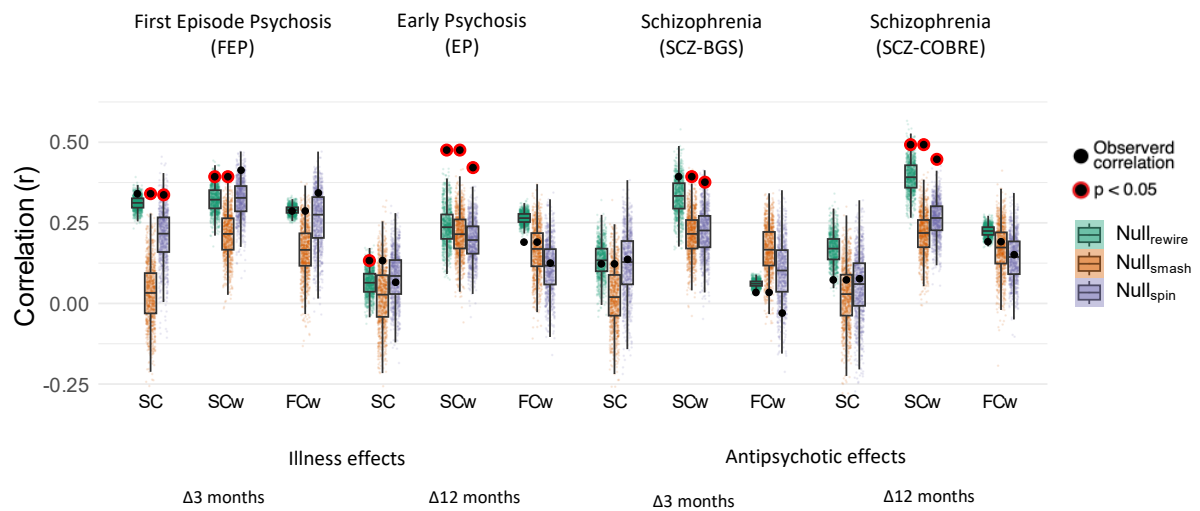

**eFigure 8. Replication of Results Using Voxel-Based Morphomet**

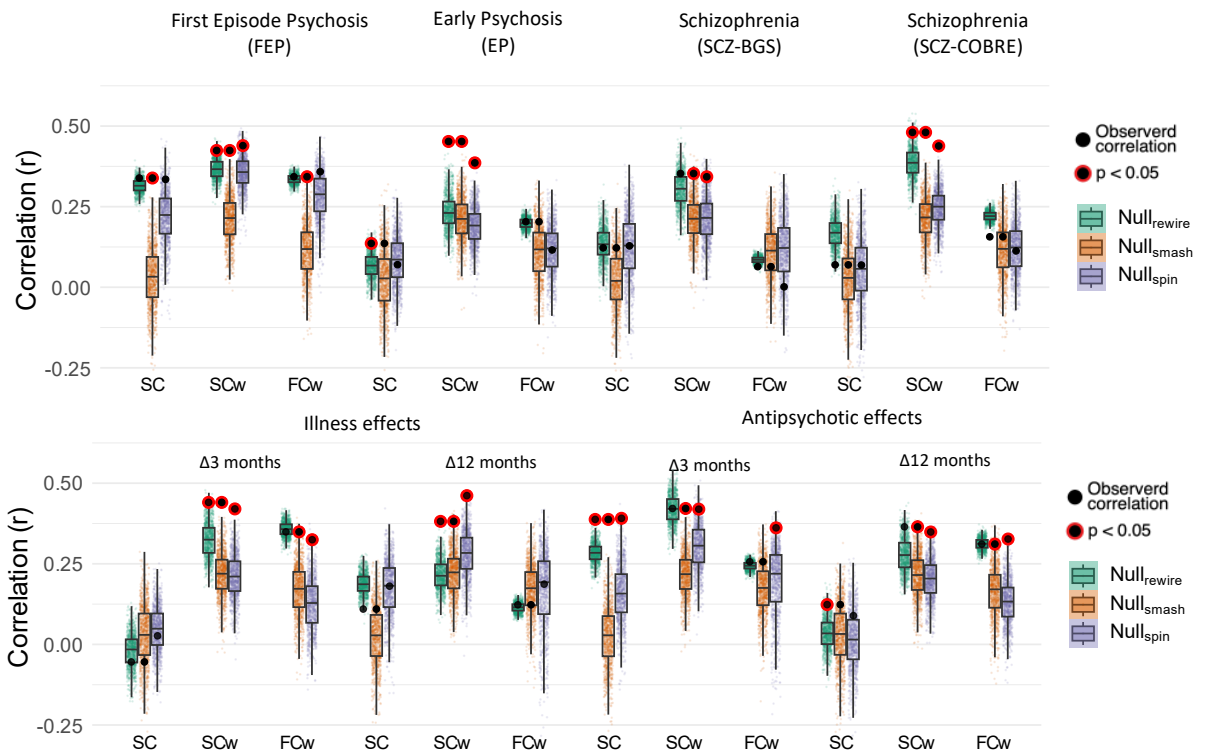

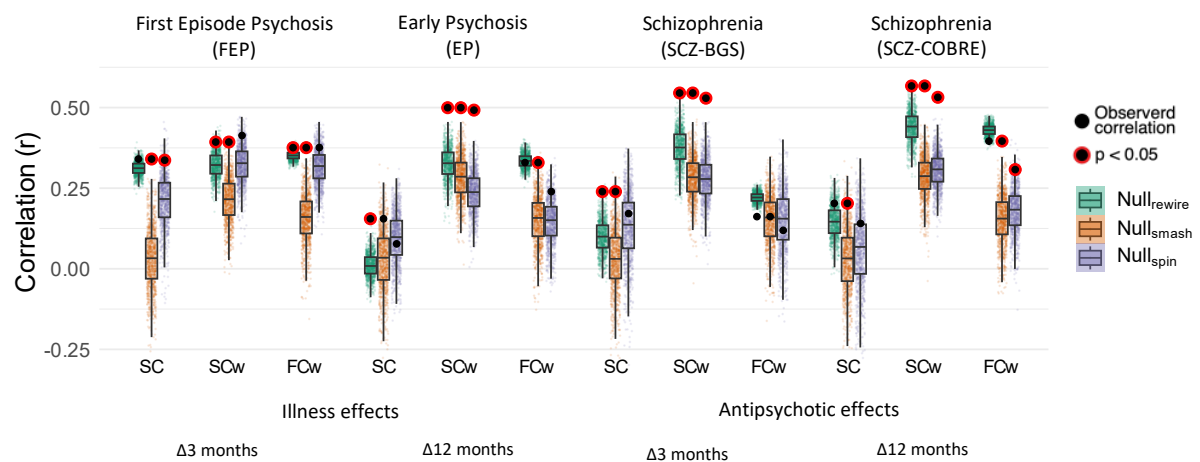

**Figure 9.** Replication of Results Applying Global Signal Regression to FC Data

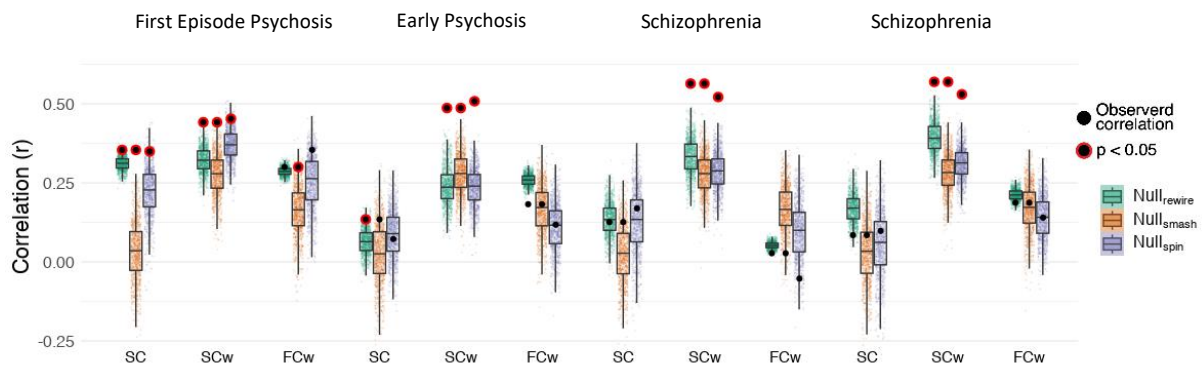

**Figure 10.** Replication of Results Using Representative Structural and Functional Connectomes From an Older Subset of the Independent Healthy Controls (n=31; age=36.06±4.9) that is more closely matched in age to the two established schizophrenia samples.

#### eReferences.

- 1 Francey, S. M. *et al.* Psychosocial Intervention With or Without Antipsychotic Medication for First-Episode Psychosis: A Randomized Noninferiority Clinical Trial. *Schizophrenia Bulletin Open* **1**, doi:10.1093/schizbullopen/sgaa015 (2020).
- 2 O'Donoghue, B. *et al.* Staged treatment and acceptability guidelines in early psychosis study (STAGES): A randomized placebo controlled trial of intensive psychosocial treatment plus or minus antipsychotic medication for first-episode psychosis with low-risk of self-harm or aggression. Study protocol and baseline characteristics of participants. *Early Intervention in Psychiatry* **0**, doi:10.1111/eip.12716 (2019).
- 3 Chopra, S. *et al.* Functional connectivity in antipsychotic-treated and antipsychotic-naive patients with first-episode psychosis and low risk of self-harm or aggression: a secondary analysis of a randomized clinical trial. *JAMA psychiatry* **78**, 994-1004 (2021).
- 4 Chopra, S. *et al.* Differentiating the effect of antipsychotic medication and illness on brain volume reductions in first-episode psychosis: A Longitudinal, Randomised, Triple-blind, Placebo-controlled MRI Study. *Neuropsychopharmacology* **46**, 1494-1501 (2021).
- 5 Lewandowski, K. E., Bouix, S., Ongur, D. & Shenton, M. E. Neuroprogression across the early course of psychosis. *Journal of psychiatry and brain science* **5** (2020).
- 6 Bustillo, J. R. *et al.* Glutamatergic and neuronal dysfunction in gray and white matter: a spectroscopic imaging study in a large schizophrenia sample. *Schizophrenia bulletin* **43**, 611-619 (2017).
- 7 Çetin, M. S. *et al.* Thalamus and posterior temporal lobe show greater inter-network connectivity at rest and across sensory paradigms in schizophrenia. *Neuroimage* **97**, 117-126, doi:10.1016/j.neuroimage.2014.04.009 (2014).

- 8 Sabaroedin, K. *et al.* Functional Connectivity of Corticostriatal Circuitry and  
Psychosis-like Experiences in the General Community. *Biological Psychiatry* **86**, 16-  
24, doi:10.1016/j.biopsych.2019.02.013 (2019).
- 9 Esteban, O. *et al.* MRIQC: Advancing the automatic prediction of image quality in  
MRI from unseen sites. *PLOS ONE* **12**, e0184661, doi:10.1371/journal.pone.0184661  
(2017).
- 10 Gaser, C. & Dahnke, R. CAT - A Computational Anatomy Toolbox for the Analysis  
of Structural MRI Data. *HBM*, 336-348 (2016).
- 11 Ashburner, J. *et al.* SPM12 manual. *Wellcome Trust Centre for Neuroimaging*,  
*London, UK* **2464** (2014).
- 12 Schwarz, D. & Kašpárek, T. Comparison of Two Methods for Automatic Brain  
Morphometry Analysis. *Radioengineering* **20** (2011).
- 13 Shafiei, G. *et al.* Spatial patterning of tissue volume loss in schizophrenia reflects  
brain network architecture. *Biological psychiatry* **87**, 727-735 (2020).
- 14 Shafiei, G. *et al.* Network structure and transcriptomic vulnerability shape atrophy in  
frontotemporal dementia. *Brain*, doi:10.1093/brain/awac069 (2022).
- 15 Ashburner, J. A fast diffeomorphic image registration algorithm. *NeuroImage* **38**, 95-  
113, doi:10.1016/j.neuroimage.2007.07.007 (2007).
- 16 Guillaume, B., Hua, X., Thompson, P. M., Waldorp, L. & Nichols, T. E. Fast and  
accurate modelling of longitudinal and repeated measures neuroimaging data.  
*NeuroImage* **94**, 287-302, doi:10.1016/j.neuroimage.2014.03.029 (2014).
- 17 Schaefer, A. *et al.* Local-Global Parcellation of the Human Cerebral Cortex from  
Intrinsic Functional Connectivity MRI. *Cerebral Cortex (New York, N.Y.: 1991)* **28**,  
3095-3114, doi:10.1093/cercor/bhx179 (2018).
- 18 Tian, Y., Margulies, D. S., Breakspear, M. & Zalesky, A. Topographic organization  
of the human subcortex unveiled with functional connectivity gradients. *Nature  
Neuroscience* **23**, 1421-1432, doi:10.1038/s41593-020-00711-6 (2020).
- 19 Theaud, G. *et al.* TractoFlow: A robust, efficient and reproducible diffusion MRI  
pipeline leveraging Nextflow & Singularity. *NeuroImage* **218**, 116889,  
doi:<https://doi.org/10.1016/j.neuroimage.2020.116889> (2020).
- 20 Avants, B. B. *et al.* A reproducible evaluation of ANTs similarity metric performance  
in brain image registration. *Neuroimage* **54**, 2033-2044,  
doi:10.1016/j.neuroimage.2010.09.025 (2011).
- 21 Garyfallidis, E. *et al.* Dipy, a library for the analysis of diffusion MRI data. *Frontiers  
in Neuroinformatics* **8**, doi:10.3389/fninf.2014.00008 (2014).
- 22 Tournier, J. D. *et al.* MRtrix3: A fast, flexible and open software framework for  
medical image processing and visualisation. *NeuroImage* **202**, 116137,  
doi:<https://doi.org/10.1016/j.neuroimage.2019.116137> (2019).
- 23 Basser, P. J., Mattiello, J. & LeBihan, D. MR diffusion tensor spectroscopy and  
imaging. *Biophys J* **66**, 259-267, doi:10.1016/s0006-3495(94)80775-1 (1994).
- 24 Tournier, J. D., Calamante, F. & Connelly, A. Robust determination of the fibre  
orientation distribution in diffusion MRI: Non-negativity constrained super-resolved  
spherical deconvolution. *NeuroImage* **35**, 1459-1472,  
doi:<https://doi.org/10.1016/j.neuroimage.2007.02.016> (2007).
- 25 Descoteaux, M., Deriche, R., Knösche, T. R. & Anwander, A. Deterministic and  
probabilistic tractography based on complex fibre orientation distributions. *IEEE  
Trans Med Imaging* **28**, 269-286, doi:10.1109/tmi.2008.2004424 (2009).
- 26 Ad-Dab'bagh, Y. *et al.* in *Proceedings of the 12th annual meeting of the organization  
for human brain mapping.* (Florence, Italy).

- 27 Girard, G., Whittingstall, K., Deriche, R. & Descoteaux, M. Towards quantitative connectivity analysis: reducing tractography biases. *Neuroimage* **98**, 266-278, doi:10.1016/j.neuroimage.2014.04.074 (2014).
- 28 Smith, R. E., Tournier, J. D., Calamante, F. & Connelly, A. Anatomically-constrained tractography: improved diffusion MRI streamlines tractography through effective use of anatomical information. *Neuroimage* **62**, 1924-1938, doi:10.1016/j.neuroimage.2012.06.005 (2012).
- 29 Al-Sharif, N. B., St-Onge, E., Theaud, G., Evans, A. C. & Descoteaux, M. Processing the diffusion-weighted magnetic resonance imaging of the PING dataset. *bioRxiv*, 2020.2011.2024.396549, doi:10.1101/2020.11.24.396549 (2020).
- 30 Maier-Hein, K. H. *et al.* The challenge of mapping the human connectome based on diffusion tractography. *Nature Communications* **8**, 1349, doi:10.1038/s41467-017-01285-x (2017).
- 31 Schilling, K. G. *et al.* Limits to anatomical accuracy of diffusion tractography using modern approaches. *Neuroimage* **185**, 1-11, doi:10.1016/j.neuroimage.2018.10.029 (2019).
- 32 Schiavi, S. *et al.* A new method for accurate in vivo mapping of human brain connections using microstructural and anatomical information. *Science advances* **6**, eaba8245-eaba8245, doi:10.1126/sciadv.aba8245 (2020).
- 33 Betzel, R. F., Griffa, A., Hagmann, P. & Mišić, B. Distance-dependent consensus thresholds for generating group-representative structural brain networks. *Netw Neurosci* **3**, 475-496, doi:10.1162/netn\_a\_00075 (2019).
- 34 Woolrich, M. W., Ripley, B. D., Brady, M. & Smith, S. M. Temporal autocorrelation in univariate linear modeling of fMRI data. *Neuroimage* **14**, 1370-1386, doi:10.1006/nimg.2001.0931 (2001).
- 35 Jenkinson, M., Beckmann, C. F., Behrens, T. E., Woolrich, M. W. & Smith, S. M. FSL. *Neuroimage* **62**, 782-790, doi:10.1016/j.neuroimage.2011.09.015 (2012).
- 36 Griffanti, L. *et al.* ICA-based artefact removal and accelerated fMRI acquisition for improved resting state network imaging. *Neuroimage* **95**, 232-247, doi:10.1016/j.neuroimage.2014.03.034 (2014).
- 37 Salimi-Khorshidi, G. *et al.* Automatic denoising of functional MRI data: combining independent component analysis and hierarchical fusion of classifiers. *Neuroimage* **90**, 449-468, doi:10.1016/j.neuroimage.2013.11.046 (2014).
- 38 Murphy, K. & Fox, M. D. Towards a consensus regarding global signal regression for resting state functional connectivity MRI. *Neuroimage* **154**, 169-173, doi:10.1016/j.neuroimage.2016.11.052 (2017).
- 39 Burt, J. B., Helmer, M., Shinn, M., Anticevic, A. & Murray, J. D. Generative modeling of brain maps with spatial autocorrelation. *NeuroImage* **220**, 117038 (2020).
- 40 Váša, F. *et al.* Adolescent tuning of association cortex in human structural brain networks. *Cerebral Cortex* **28**, 281-294 (2018).
- 41 Betzel, R. F. & Bassett, D. S. Specificity and robustness of long-distance connections in weighted, interareal connectomes. *Proceedings of the National Academy of Sciences*, 201720186, doi:10.1073/PNAS.1720186115 (2018).
- 42 Raj, A., Kuceyeski, A. & Weiner, M. A network diffusion model of disease progression in dementia. *Neuron* **73**, 1204-1215, doi:10.1016/j.neuron.2011.12.040 (2012).
- 43 Raj, A. *et al.* Network diffusion model of progression predicts longitudinal patterns of atrophy and metabolism in Alzheimer's disease. *Cell reports* **10**, 359-369 (2015).

- 44 Pandya, S. *et al.* Predictive model of spread of Parkinson's pathology using network diffusion. *NeuroImage* **192**, 178-194 (2019).
- 45 Nichols, T. & Hayasaka, S. Controlling the familywise error rate in functional neuroimaging: a comparative review. *Statistical methods in medical research* **12**, 419-446 (2003).
- 46 Rubinov, M. & Sporns, O. Complex network measures of brain connectivity: uses and interpretations. *Neuroimage* **52**, 1059-1069 (2010).
- 47 Carletti, F. *et al.* Alterations in White Matter Evident Before the Onset of Psychosis. *Schizophrenia Bulletin* **38**, 1170-1179, doi:10.1093/schbul/sbs053 (2012).
- 48 Di Biase, M. A. *et al.* White matter changes in psychosis risk relate to development and are not impacted by the transition to psychosis. *Molecular Psychiatry*, doi:10.1038/s41380-021-01128-8 (2021).
- 49 Kraguljac, N. V. *et al.* White matter integrity, duration of untreated psychosis, and antipsychotic treatment response in medication-naïve first-episode psychosis patients. *Molecular Psychiatry* **26**, 5347-5356, doi:10.1038/s41380-020-0765-x (2021).
- 50 Kelly, S. *et al.* Widespread white matter microstructural differences in schizophrenia across 4322 individuals: results from the ENIGMA Schizophrenia DTI Working Group. *Molecular psychiatry* **23**, 1261-1269 (2018).
