# Supplementary material
Source: PubMed Central journal article supplement (PMC10512169)
Supplement: jamapsychiatry-e233293-s002.pdf [file jamapsychiatry-e233293-s002.pdf]

## Data Sharing Statement

Chopra. Network-Based Spreading of Gray Matter Changes Across Different Stages of Psychosis. *JAMA Psychiatry*. Published September 20, 2023.

doi:10.1001/jamapsychiatry.2023.3293

### Data

**Data available:** No

### Additional Information

**Explanation for why data not available:** Data for the early psychosis (Human Connectome Project - Early Psychosis), and two schizophrenia cohorts (BrainGluSchi & COBRE) are publically available. Data for the longitudinal FEP and independent healthy control cohorts will be made available upon request and review by the study team.
